# Supplementary material for: Exploring the relationship between learning approaches and problem-based learning: insights from a longitudinal study in medical students
Source: Springer Nature journal article supplement (doi:10.1186/s12909-025-07171-1), 2025-04-26
Supplement: MOESM1 [file 12909_2025_7171_MOESM1_ESM.docx]

**Supplemental Online Material**

**Online Table 1.** Cronbach’s for learning approaches and their subscales

| Subscale/scale | No. of items | Cronbach’s  1st measurement | Cronbach’s  2nd measurement |
| --- | --- | --- | --- |
| Deep motivation | 3 | 0.61 | 0.55 |
| Deep process | 3 | 0.48 | 0.47 |
| Deep | 6 | 0.62 | 0.67 |
| Surface motivation | 3 | 0.35 | 0.30 |
| Surface process | 3 | 0.55 | 0.54 |
| Surface | 6 | 0.61 | 0.57 |
| Strategic motivation | 3 | 0.61 | 0.76 |
| Strategic process | 3 | 0.59 | 0.67 |
| Strategic | 6 | 0.58 | 0.58 |

n=70

**Online Table 2.** Effect of entry year on learning approach at the beginning and end of Year 1.

|  | **Deep motivation**  **Measurement 1**  **Mean (SD)** | **Deep motivation**  **Measurement 2 Mean (SD)** | ***p-value*** | **Deep process**  **Measurement 1**  **Mean (SD)** | **Deep process**  **Measurement 2 Mean (SD)** | ***p-value*** | **Deep**  **Measurement 1**  **Mean (SD)** | **Deep**  **Measurement 2**  **Mean (SD)** | ***p-value*** |
| --- | --- | --- | --- | --- | --- | --- | --- | --- | --- |
| **Cohort**  2019-2020  2020-2021 | 10.79 (2.64)  11.50 (2.39) | 10.04 (1.88)  10.48 (2.99) | 0.078  0.168 | 10.67 (2.43)  11.48 (2.15) | 11.23 (1.96)  11.05 (2.82) | 0.172  0.515 | 21.46 (4.17)  22.98 (4.05) | 21.28 (3.00)  21.52 (5.57) | 0.786  0.281 |
| **p-value** | 0.111 | 0.545 |  | **0.048** | 0.784 |  | **0.039** | 0.850 |  |
|  | **Surface motivation**  **Measurement 1**  **Mean (SD)** | **Surface motivation**  **Measurement 2**  **Mean (SD)** | ***p-value*** | **Surface process Measurement 1 Mean (SD)** | **Surface process**  **Measurement 2**  **Mean (SD)** | ***p-value*** | **Surface**  **Measurement 1**  **Mean (SD)** | **Surface**  **Measurement 2 Mean (SD)** | ***p-value*** |
| **Cohort**  2019-2020  2020-2021 | 8.51 (2.48)  8.10 (234) | 8.63 (2.16)  9.09 (3.04) | 0.798  0.178 | 8.28 (3.03)  7.64 (2.80) | 7.43 (2.23)  8.27 (2.83) | 0.081  0.375 | 16.77 (4.56)  15.74 (4.49) | 16.00 (3.51)  17.36 (5.04) | 0.305  0.194 |
| **p-value** | 0.338 | 0.522 |  | 0.213 | 0.225 |  | 0.202 | 0.261 |  |
|  | **Strategic motivation Measurement 1 Mean (SD)** | **Strategic motivation Measurement 2**  **Mean (SD)** | **p-value** | **Strategic process**  **Measurement 1**  **Mean (SD)** | **Strategic process**  **Measurement 2**  **Mean (SD)** | **p-value** | **Strategic**  **Measurement 1 Mean (SD)** | **Strategic**  **Measurement 2 Mean (SD)** | **p-value** |
| **Cohort**  **2019-2020**  **2020-2021** | 9.83 (3.01)  11.36 (2.60) | 10.29 (3.22)  10.32 (3.26) | 0.432  0.187 | 10.48 (2.57)  11.34 (2.58) | 10.35 (2.38)  10.82 (3.47) | 0.787  0.523 | 20.36 (4.38)  22.71 (3.52) | 20.65 (4.06)  21.14 (4.69) | 0.714  0.164 |
| **p-value** | **0.002** | 0.975 |  | 0.060 | 0.574 |  | **0.001** | 0.675 |  |

**Notes:**

1. Students from both institutions were combined for analysis.

2. Measurement 1: n=129; Measurement 2: n=70; distribution of participants in each cohort is shown in Table 1.

**Online Table 3a.** Academic performance in basic and clinical sciences examination and learning approach.

|  | **Dependent Variable: Basic and clinical sciences** | | | | | | | | |
| --- | --- | --- | --- | --- | --- | --- | --- | --- | --- |
| **Independent Variables** | Model 1  n=64 a | Model 2  n=66 a | Model 3  n=64 a | Model 4  n=66 a | Model 5  n=65 a | Model 6  n=65 a | Model 7  n=66 a | Model 8  n=66 a | Model 9  n=66 a |
| Intercept | **60.64 (9.27)*** | **59.55 (9.37)*** | **59.06 (9.72)*** | **72.30 (10.17)*** | **64.41 (8.90)*** | **69.17 (9.97)*** | **60.77 (9.32)*** | **64.17 (9.57)*** | **61.38 (10.53)*** |
| Deep motivation learning | 0.35 (0.50) |  |  |  |  |  |  |  |  |
| Deep process learning |  | 0.38 (0.49) |  |  |  |  |  |  |  |
| Deep learning |  |  | 0.26 (0.29) |  |  |  |  |  |  |
| Surface motivation learning |  |  |  | -0.70 (0.47) |  |  |  |  |  |
| Surface process learning |  |  |  |  | -0.23 (0.46) |  |  |  |  |
| Surface learning |  |  |  |  |  | -0.31 (0.28) |  |  |  |
| Strategic motivation learning |  |  |  |  |  |  | 0.17 (0.34) |  |  |
| Strategic process learning |  |  |  |  |  |  |  | -0.10 (0.43) |  |
| Strategic learning |  |  |  |  |  |  |  |  | 0.07 (0.27) |
| Educational Institution (SGUL) | 4.30 (4.49) | 4.38 (4.43) | 4.33 (4.48) | 3.17 (4.42) | 4.32 (4.48) | 3.92 (4.44) | 4.07 (4.45) | 4.15 (4.47) | 4.26 (4.44) |
| Cohort (2020-2021) | 1.80 (3.04) | 2.25 (2.97) | 1.85 (3.03) | 2.13 (2.93) | 2.24 (3.00) | 2.21 (2.97) | 2.25 (2.98) | 2.39 (3.06) | 2.13 (3.01) |
| Gender (male) | 3.65 (2.37) | 3.84 (2.30) | 3.52 (2.37) | 3.29 (2.30) | 4.41 (2.40) | 4.13 (2.34) | 3.86 (2.31) | 4.06 (2.32) | 3.88 (2.33) |
| Age | -0.12 (0.29) | -0.09 (0.28) | -0.13 (0.29) | -0.15 (0.28) | -0.07 (0.29) | -0.11 (0.29) | -0.04 (0.29) | -0.09 (0.30) | -0.05 (0.30) |
| Ethnic Background (white) | 2.66 (2.49) | 2.29 (2.41) | 2.77 (2.49) | 2.11 (2.35) | 2.22 (2.43) | 2.25 (2.41) | 1.98 (2.39) | 2.07 (2.41) | 1.97 (2.40) |
| Educational Background (biomedical sciences) | 3.44 (2.71) | 3.36 (2.68) | 3.26 (2.71) | 3.34 (2.62) | 4.05 (2.77) | 4.01 (2.68) | 3.63 (2.66) | 3.71 (2.70) | 3.56 (2.68) |
| Level of Education (master or doctorate) | -1.62 (2.92) | -1.78 (2.85) | -1.57 (2.91) | -2.54 (2.85) | -2.00 (2.95) | -2.47 (2.94) | -1.75 (2.85) | -1.60 (2.95) | -1.87 (2.89) |
| Country of Origin (Great Britain) | -3.24 (4.25) | -3.42 (4.21) | -3.46 (4.26) | -1.80 (4.19) | -2.88 (4.24) | -2.38 (4.22) | -2.89 (4.20) | -2.78 (4.34) | -3.15 (4.22) |
| Native Language (other than English) | -0.41 (3.40) | -0.57 (3.32) | -0.29 (3.39) | -1.13 (3.28) | -0.66 (3.35) | -0.85 (3.33) | -0.91 (3.36) | -0.63 (3.34) | -0.81 (3.37) |

**Notes:**

1. *: p<0.05; a: n indicates the complete cases sample size for each model
2. Regression coefficients and standard errors of the models between each learning approach (scale/subscale) at the second measurement and Basic and clinical sciences adjusted by students’ characteristics are shown in the table.

**Online Table 3b.** Academic performance in pharmacology post-test and learning approach.

|  | **Dependent Variable: Pharmacology test** | | | | | | | | |
| --- | --- | --- | --- | --- | --- | --- | --- | --- | --- |
| **Independent Variables** | Model 1  n=56 a | Model 2  n=58 a | Model 3  n=56 a | Model 4  n=58 a | Model 5  n=57 a | Model 6  n=57 a | Model 7  n=58 a | Model 8  n=58 a | Model 9  n=58 a |
| Intercept | **23.03 (5.65)*** | **21.03 (6.12)*** | **22.88 (5.99)*** | **23.73 (6.92)*** | **21.59 (5.90)*** | **23.02 (6.83)*** | **18.25 (6.22)*** | **19.73 (6.18)*** | **16.61 (7.16)*** |
| Deep motivation learning | -0.19 (0.32) |  |  |  |  |  |  |  |  |
| Deep process learning |  | -0.04 (0.36) |  |  |  |  |  |  |  |
| Deep learning |  |  | -0.08 (0.20) |  |  |  |  |  |  |
| Surface motivation learning |  |  |  | -0.22 (0.31) |  |  |  |  |  |
| Surface process learning |  |  |  |  | -0.15 (0.33) |  |  |  |  |
| Surface learning |  |  |  |  |  | -0.12 (0.20) |  |  |  |
| Strategic motivation learning |  |  |  |  |  |  | 0.18 (0.24) |  |  |
| Strategic process learning |  |  |  |  |  |  |  | 0.09 (0.28) |  |
| Strategic learning |  |  |  |  |  |  |  |  | 0.17 (0.20) |
| Educational Institution (SGUL) | 3.75 (2.69) | 3.97 (2.80) | 3.77 (2.69) | 3.60 (2.84) | 3.88 (2.80) | 3.68 (2.81) | 3.70 (2.80) | 4.07 (2.82) | 3.92 (2.78) |
| Cohort (2020-2021) | -1.54 (1.94) | -1.29 (1.96) | -1.63 (1.93) | -1.42 (1.96) | -1.42 (1.98) | -1.46 (1.97) | -1.36 (1.95) | -1.46 (2.03) | -1.68 (2.00) |
| Gender (male) | -0.60 (1.48) | 0.15 (1.50) | -0.57 (1.48) | -0.07 (1.53) | 0.58 (1.56) | 0.41 (1.53) | 0.02 (1.50) | 0.08 (1.52) | -0.10 (1.52) |
| Age | 0.09 (0.18) | 0.13 (0.19) | 0.09 (0.18) | 0.09 (0.19) | 0.12 (0.19) | 0.10 (0.19) | 0.15 (0.19) | 0.14 (0.19) | 0.18 (0.20) |
| Ethnic Background (white) | 1.84 (1.55) | 1.32 (1.59) | 1.87 (1.55) | 1.39 (1.58) | 1.57 (1.60) | 1.58 (1.59) | 1.34 (1.57) | 1.24 (1.60) | 1.18 (1.58) |
| Educational Background (biomedical sciences) | **3.65 (1.79)*** | **3.74 (1.86)*** | 3.64 (1.81) | 3.54 (1.83) | **3.95 (1.84)*** | **3.84 (1.83)*** | 3.62 (1.82) | 3.56 (1.88) | 3.36 (1.85) |
| Level of Education (master or doctorate) | 0.17 (1.81) | -0.56 (1.86) | 0.16 (1.81) | -0.75 (1.87) | -0.55 (1.87) | -0.65 (1.88) | -0.43 (1.86) | -0.65 (1.88) | -0.63 (1.85) |
| Country of Origin (Great Britain) | -1.31 (2.51) | -1.45 (2.63) | -1.27 (2.52) | -1.06 (2.67) | -1.20 (2.63) | -1.00 (2.65) | -1.25 (2.62) | -1.68 (2.69) | -1.64 (2.60) |
| Native Language (other than English) | **5.04 (2.17)*** | 4.29 (2.23) | **5.07 (2.17)*** | 4.31 (2.22) | 4.42 (2.67) | 4.41 (2.24) | 3.97 (2.25) | 4.24 (2.23) | 3.95 (2.24) |

**Notes:**

1. *:p<0.05; a: n indicates the complete cases sample size for each model2. Regression coefficients and standard errors of the models between each learning approach (scale/subscale) at the second measurement and Pharmacology post-test adjusted by students’ characteristics are shown in the table.

**Online Table 3c.** Academic performance in OSCE and learning approach.

|  | **Dependent Variable: OSCE** | | | | | | | | |
| --- | --- | --- | --- | --- | --- | --- | --- | --- | --- |
| **Independent Variables** | Model 1  n=21 a | Model 2  n=22 a | Model 3  n=21 a | Model 4  n=22 a | Model 5  n=22 a | Model 6  n=22 a | Model 7  n=22 a | Model 8  n=22 a | Model 9  n=22 a |
| Intercept | **67.65 (10.45)*** | **68.19 (11.53)*** | **68.54 (10.83)*** | **70.17 (11.88)*** | **70.59 (9.22)*** | **68.44 (10.23)*** | **65.37 (15.13)*** | **58.73 (11.06)*** | **49.20 (15.68)*** |
| Deep motivation learning | 0.27 (0.63) |  |  |  |  |  |  |  |  |
| Deep process learning |  | 0.21 (0.62) |  |  |  |  |  |  |  |
| Deep learning |  |  | 0.08 (0.32) |  |  |  |  |  |  |
| Surface motivation learning |  |  |  | 0.02 (0.60) |  |  |  |  |  |
| Surface process learning |  |  |  |  | 0.53 (0.63) |  |  |  |  |
| Surface learning |  |  |  |  |  | 0.17 (0.36) |  |  |  |
| Strategic motivation learning |  |  |  |  |  |  | 0.24 (0.57) |  |  |
| Strategic process learning |  |  |  |  |  |  |  | 0.78 (0.46) |  |
| Strategic learning |  |  |  |  |  |  |  |  | 0.59 (0.36) |
| Educational Institution (SGUL) | -3.18 (3.99) | -3.75 (3.52) | -2.61 (3.70) | -3.41 (3.62) | -2.93 (3.38) | -2.94 (3.54) | -3.48 (3.39) | -6.50 (3.60) | -5.86 (3.45) |
| Cohort (2020-2021)b | - | - | - | - | - | - | - | - | - |
| Gender (male) | 7.32 (3.56) | 5.21 (3.38) | 6.89 (3.37) | 5.17 (3.45) | 5.59 (3.35) | 5.47 (3.43) | 4.62 (3.60) | 6.52 (3.18) | 4.87 (3.10) |
| Age | -0.10 (0.37) | -0.08 (0.40) | -0.08 (0.37) | -0.06 (0.40) | -0.24 (0.44) | -0.11 (0.40) | 0.04 (0.46) | 0.10 (0.37) | 0.31 (0.43) |
| Ethnic Background (white) | **12.27 (3.96)*** | **12.40 (3.96)*** | **11.81 (3.93)*** | **11.67 (3.52)*** | **11.71 (3.27)*** | **11.41 (3.38)*** | **11.59 (3.34)*** | **13.06 (3.15)*** | **12.46 (3.10)*** |
| Educational Background (biomedical sciences) | 4.69 (3.58) | 3.88 (3.78) | 4.51 (3.58) | 3.59 (3.78) | 1.61 (4.33) | 2.81 (4.04) | 4.56 (4.32) | 3.81 (3.36) | 6.11 (3.72) |
| Level of Education (master or doctorate) | **-8.56 (3.88)*** | -7.33 (4.12) | -8.43 (3.91) | -6.97 (4.20) | -4.88 (4.67) | -5.99 (4.53) | -8.01 (4.65) | **-9.46 (3.93)*** | **-11.35 (4.54)*** |
| Country of Origin (Great Britain)c | - | - | - | - | - | - | - | - | - |
| Native Language (other than English) | -2.13 (3.70) | -1.19 (3.82) | -1.79 (3.60) | -1.24 (4.06) | 0.20 (4.13) | -0.43 (4.20) | -1.89 (4.07) | -2.04 (3.50) | -3.36 (3.72) |

**Notes:**

1. *:p<0.05; a: n indicates the complete cases sample size for each model; b: “Cohort” is excluded from this analysis as only Cohort 2 students had an OSCE assessment (due to the Covid pandemic, there was no OSCE in cohort 1); c: “Country of Origin” is excluded from this analysis due to collinearity (correlation between country of origin and educational institution is 1 as all students in SGUL are from Great Britain while all students in UNIC are from other countries in this complete cases sample)
2. Regression coefficients and standard errors of the models between each learning approach (scale/subscale) at the second measurement and OSCE adjusted by students’ characteristics are shown in the table.
